# Supplementary material for: Natural Extracts to Augment Energy Expenditure as a Complementary Approach to Tackle Obesity and Associated Metabolic Alterations
Source: PubMed Central journal article supplement (PMC7999034; doi:10.3390/biom11030412), 2021-03-10
Supplement: biomolecules-11-00412-s001.pdf [file biomolecules-11-00412-s001.pdf]

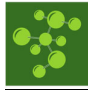

*Supplementary material*

## Natural extracts to augment energy expenditure as a complementary approach to tackle obesity and associated metabolic alterations.

Marina Reguero<sup>1,2,\*</sup>, Marta Gómez de Cedrón<sup>1,\*,#</sup>, Guillermo Reglero<sup>3</sup>, José Carlos Quintela<sup>2</sup> and Ana Ramírez de Molina<sup>1,#</sup>

<sup>1</sup> Molecular Oncology Group. Precision Nutrition and Health, IMDEA Food Institute, CEI UAM + CSIC, Ctra. de Cantoblanco 8, 28049, Madrid, Spain

<sup>2</sup> NATAC BIOTECH, Electronica 7, 28923 Alcorcón, Madrid, Spain

<sup>3</sup> Production and Characterization of Novel Foods Department, Institute of Food Science Research CIAL, CEI UAM + CSIC, 28049, Madrid, Spain

<sup>#</sup> Correspondence: Ana Ramírez de Molina (ana.ramirez@imdea.org) and Marta Gómez de Cedrón (marta.gomezdecedron@imdea.org)

\* Equal contribution

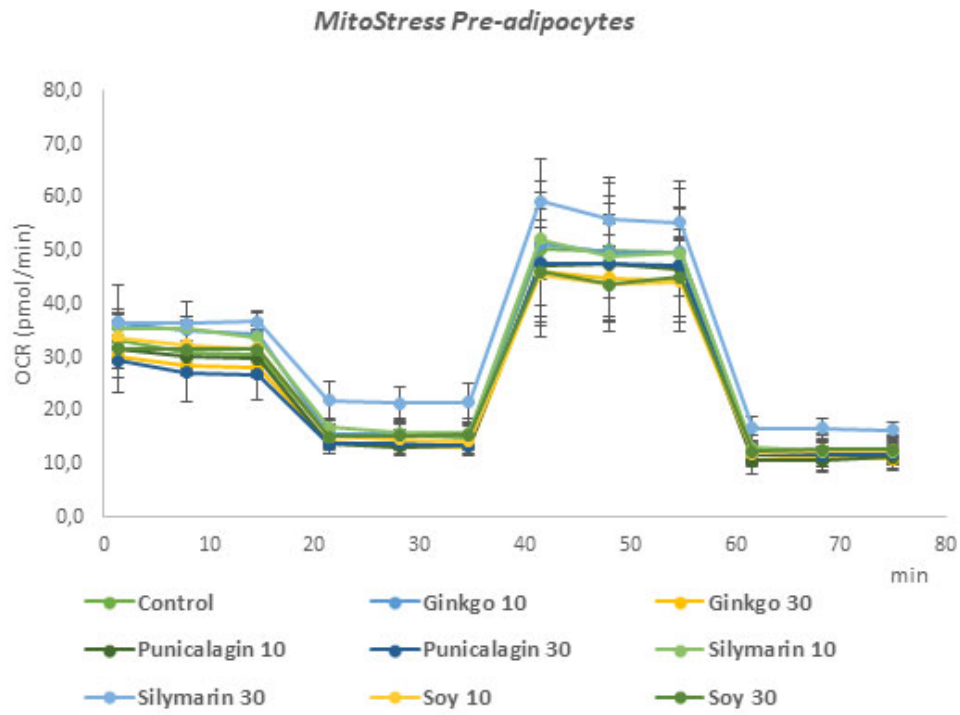

**Figure S1.** Effect of the extracts on mitochondrial oxidative phosphorylation of humannon-differentiated pre-adipocytes.

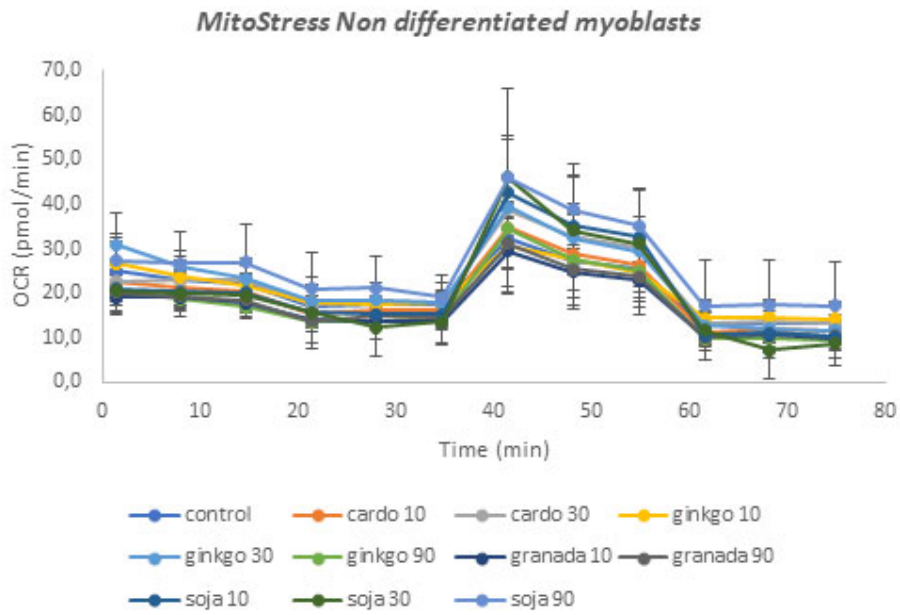

**Figure S2.** Effect of the extracts on mitochondrial oxidative phosphorylation of human non differentiated myoblasts.

**Table S1.** List of Taqman probes used in the study.

| <b>GENES</b>    | <b>Thermofisher probe's code</b> |
|-----------------|----------------------------------|
| <i>ADRB1</i>    | Hs02330048_s1                    |
| <i>AGT</i>      | Hs01586213_m1                    |
| <i>LEPR</i>     | Hs00174497_m1                    |
| <i>LPL</i>      | Hs00173425_m1                    |
| <i>MTHFR</i>    | Hs01114487_m1                    |
| <i>PPARγ</i>    | Hs01115513_m1                    |
| <i>TCF7L2</i>   | Hs01009044_m1                    |
| <i>UCP2</i>     | Hs01075227_m1                    |
| <i>ACE</i>      | Hs00174179_m1                    |
| <i>CLOCK</i>    | Hs00231857_m1                    |
| <i>COL5A1</i>   | Hs00609133_m1                    |
| <i>HFE</i>      | Hs05045803_s1                    |
| <i>HIF1A</i>    | Hs00153153_m1                    |
| <i>PPARA</i>    | Hs00947536_m1                    |
| <i>PPARGC1A</i> | Hs00173304_m1                    |
| <i>AHR</i>      | Hs00169233_m1                    |
| <i>BNC2</i>     | Hs00417700_m1                    |
| <i>DLGAP1</i>   | Hs00191052_m1                    |
| <i>COMT</i>     | Hs00241349_m1                    |
| <i>IL4-R</i>    | Hs00965056_m1                    |
| <i>HLA-DQA1</i> | Hs03007426_mH                    |
| <i>MCM6</i>     | Hs00962418_m1                    |
| <i>ABCA1</i>    | Hs01059137_m1                    |
| <i>FTO</i>      | Hs01057139_g1                    |
| <i>MC4R</i>     | Hs00271877_s1                    |
| <i>TMEM18</i>   | Hs00894216_m1                    |
| <i>GNPDA2</i>   | Hs00385682_m1                    |
| <i>KCTD15</i>   | Hs00225337_m1                    |
| <i>ETV5</i>     | Hs00927557_m1                    |
| <i>NPY</i>      | Hs00173470_m1                    |
| <i>APOA5</i>    | Hs00364830_m1                    |
| <i>GCKR</i>     | Hs00386984_m1                    |
| <i>CD36</i>     | Hs00354519_m1                    |
| <i>B2M</i>      | Hs00187842_m1                    |
| <i>GAPDH</i>    | Hs02786624_g1                    |

**Table S2.** List of primers used in the study.

| <b>GEN</b>                      | <b>FORWARD PRIMER</b>   | <b>bp</b> | <b>REVERSE PRIMER</b>   | <b>bp</b> | <b>SPECIE</b> |
|---------------------------------|-------------------------|-----------|-------------------------|-----------|---------------|
| <i>MYOG</i>                     | TCAACCAGGAGGAGCGTGA     | 19        | TCTGTAGGGTCAGCCGTGAG    | 20        | human         |
| <i>MEF2</i>                     | AACAAAGCCCTCAGCAGGT     | 19        | ACTTGCACAGCTCAGTTCCC    | 20        | human         |
| <i>UCP1</i>                     | ACAGAAGGGCGGATGAAACT    | 20        | CTTGCTTCTAAACTAGGTGCTG  | 23        | human         |
| <i>TFAM</i>                     | ATGGCGTTTCTCCGAAGCAT    | 20        | TCCGCCCTATAAGCATCTTGA   | 21        | human         |
| <i>PPARG</i>                    | ACCAAAGTGCAATCAAAGTGGA  | 22        | ATGAGGGAGTTGGAAGGCTCT   | 21        | human         |
| <i>UCP3</i>                     | AAGGTCCGATTTCCAGGCCAG   | 20        | GCGATGGTTCTGTAGGCGTC    | 20        | human         |
| <i>C/EBP<math>\alpha</math></i> | TATAGGCTGGGCTTCCCCTT    | 20        | AGCTTCTGGTGTGACTCGG     | 20        | human         |
| <i>ATP2A1</i>                   | AAACCACGGAGGAATGTTTGG   | 21        | AGCTCATTGAGGCCGTATTTT   | 21        | human         |
| <i>MYH2</i>                     | AGAAACTTCGCATGGACCTAGA  | 22        | CCAAGTGCCTGTTTCATCTTCA  | 21        | human         |
| <i>FABP4</i>                    | ACTGGGCCAGGAATTTGACG    | 20        | CTCGTGAAGTGACGCCCTT     | 19        | human         |
| <i>Cidea</i>                    | TTATGGGATCACAGACTAAGCGA | 23        | TGCTCCTGTCATGGTTGGAGA   | 21        | human         |
| <i>Ckmt2</i>                    | GACCCCGTCATCAAATAAGAC   | 22        | AGCACGTAATGCTCGTCGAAC   | 21        | human         |
| <i>Lep</i>                      | TGCCTCCAGAAACGTGATCC    | 21        | CTCTGTGGAGTAGCCTGAAGC   | 21        | human         |
| <i>PRDM16</i>                   | CGATGCCGACTTTTGGGAAG    | 20        | GTGGAGAGGAGTGTCTTCGG    | 20        | human         |
| <i>PGC1<math>\alpha</math></i>  | ATTGGAGCCCATGGATGAA     | 20        | GCGGCTGTTACTCTCTCTCC    | 20        | human         |
| <i>CPT1A</i>                    | CTCAGTGGGAGCGGATGTTT    | 20        | TGCTGTCTCTCATGTGCTGG    | 20        | human         |
| <i>LDLR</i>                     | CAGTACCCCTCGAGACAGA     | 20        | CACTGTCCGAAGCCTGTTCT    | 20        | human         |
| <i>IRS1</i>                     | GCAACCAGAGTGCCAAAGTG    | 20        | GCACTGGGTGTTGAGGAGAA    | 20        | human         |
| <i>FASN</i>                     | TATGAAGCCATCGTGGACGG    | 20        | GAAGAAGGAGAGCCGTTGG     | 20        | human         |
| <i>UCP2</i>                     | GACCATTGCCGAGAGGAAG     | 20        | GAAGTGGCAAGGGAGGTCAT    | 20        | human         |
| <i>FNDC5</i>                    | CGTGGTCTGTTTCATGTGGG    | 20        | GGTCTTGCCCTCACCTTGCT    | 20        | human         |
| <i>BDNF</i>                     | TAACGGCGGCAGACAAAAGA    | 21        | TGCACTTGGTCTCGTAGAAGTAT | 23        | human         |
| <i>IL6</i>                      | CCTGAACCTTCAAAGATGGC    | 21        | TTCACCAGGCAAGTCTCTCA    | 21        | human         |
| <i>SIRT1</i>                    | TGTGTCATAGGTTAGGTGGTGA  | 22        | AGCCAATTCTTTTGTGTTTCGTG | 23        | human         |
| <i>B2M</i>                      | GATGAGTATGCCTGCCGTGT    | 20        | TGCGGCATCTTCAAACCTCC    | 20        | human         |
